# Supplementary material
Source: PubMed Central journal article supplement (PMC8574294)
Supplement: supplementaryfile6_bbab114.pdf [file supplementaryfile6_bbab114.pdf]

| No. | COMPOUND       | Max Norm. Rank | List ID                                               | 2D STRUCTURE                                                                       | FORMULA                                                        | SMILE                                                                             | MW     | LogP/LogS  | CLASSIFICATION                                                                                                            | Drugs in clinical trials                                                                                                                                                                                                                                                                                                                                                                    |
|-----|----------------|----------------|-------------------------------------------------------|------------------------------------------------------------------------------------|----------------------------------------------------------------|-----------------------------------------------------------------------------------|--------|------------|---------------------------------------------------------------------------------------------------------------------------|---------------------------------------------------------------------------------------------------------------------------------------------------------------------------------------------------------------------------------------------------------------------------------------------------------------------------------------------------------------------------------------------|
| 1   | Dexamethasone  | 1.00           | Tr1 - Series 1-7, TrC1 - Series 1-7, TrC2 - Series 15 | 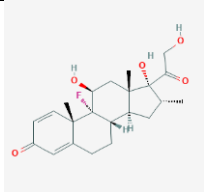  | C <sub>22</sub> H <sub>29</sub> FO <sub>5</sub>                | CC1CC2C3CCC4=C(C(=O)C=CC4(C3(C(C2(C1(C(=O)CO)O)C)O)F)C                            | 392.5  | 1.93/-3.89 | <u>MeSH</u> : Anti-inflammatory; Corticosteroid<br><u>TBC</u> : Steroid Hormone Receptor Agonist<br><u>Chem</u> : Steroid | <b>Clinical Trials:</b> 26<br><b>NCTs:</b> NCT04325061, NCT04513184, NCT04509973, NCT04499313, NCT04395105, NCT04347980, NCT04344730, NCT04360876, NCT04452565, NCT04519385, NCT04327401, NCT04445506, NCT04476979, NCT04528329, NCT04366115, NCT04468646, NCT04445337, NCT04475991, NCT04461925, NCT04425863, NCT04402840, NCT04492501, NCT04381936, NCT04380818, NCT04462367, NCT04278404 |
| 2   | Atorvastatin   | 1.00           | Tr2 - Series 15                                       |   | C <sub>33</sub> H <sub>35</sub> FN <sub>2</sub> O <sub>5</sub> | CC(C)C1=C(C(=C(N1CCC(CC(CC(=O)O)O)O)C2=CC=C(C=C2)F)C3=CC=CC=C3)C(=O)NC4=CC=C(C=C4 | 558.6  | 4.24/-5.95 | <u>MeSH</u> : Anticholesteremic<br><u>TBC</u> : Cholesterol synthesis Inhibitor<br><u>Chem</u> : Pyrrole                  | <b>Clinical Trials:</b> 4<br><b>NCTs:</b> NCT04380402, NCT04486508, NCT04466241, NCT04333407                                                                                                                                                                                                                                                                                                |
| 3   | Beta-estradiol | 1.00           | TrC4 - PBMC                                           |   | C <sub>18</sub> H <sub>24</sub> O <sub>2</sub>                 | CC12CCC3C(C1CC2O)CCC4=C3C=C(C(=C4)O                                               | 272.4  | 3.57/-4.11 | <u>MeSH</u> : Estrogen (MeSH)<br><u>TBC</u> : Estrogen receptor agonist<br><u>Chem</u> : Steroid                          | <b>Clinical Trial:</b> 1<br><b>NCTs:</b> NCT04359329                                                                                                                                                                                                                                                                                                                                        |
| 4   | Vorinostat     | 1.00           | Tr3 - BALF                                            |  | C <sub>14</sub> H <sub>20</sub> N <sub>2</sub> O <sub>3</sub>  | C1=CC=C(C=C1)NC(=O)CCCCC(=O)NO                                                    | 264.32 | 1.88/-3.57 | <u>MeSH</u> : Antineoplastic<br><u>TBC</u> : Histone deacetylase inhibitor<br><u>Chem</u> : Anilide                       |                                                                                                                                                                                                                                                                                                                                                                                             |



|    |                                |      |                              |                                                                                    |                                                                   |                                                                              |        |            |                                                                                                                                                     |                                                                                                                                                                                                                                                                                                                                                                                                                                                                                                                                                                                                                                                                                           |
|----|--------------------------------|------|------------------------------|------------------------------------------------------------------------------------|-------------------------------------------------------------------|------------------------------------------------------------------------------|--------|------------|-----------------------------------------------------------------------------------------------------------------------------------------------------|-------------------------------------------------------------------------------------------------------------------------------------------------------------------------------------------------------------------------------------------------------------------------------------------------------------------------------------------------------------------------------------------------------------------------------------------------------------------------------------------------------------------------------------------------------------------------------------------------------------------------------------------------------------------------------------------|
| 10 | Benzyl (2-oxopropyl) carbamate | 1.00 | HPAV, TaxAV                  | 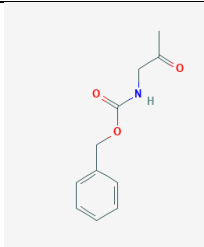   | C <sub>11</sub> H <sub>13</sub> NO <sub>3</sub>                   | CC(=O)CNC(=O)OC1=CC=CC=C1                                                    | 207.23 | 0.89/-2.72 | <i>MeSH</i> : -<br><i>TBC</i> : SARS-CoV replicase polyprotein 1ab inhibitor; 3 clpro protease inhibitor<br><i>Chem</i> : Benzyloxycarbonyl; Ketone |                                                                                                                                                                                                                                                                                                                                                                                                                                                                                                                                                                                                                                                                                           |
| 11 | Remdesivir                     | 1.00 | TaxAV, HPAV                  |   | C <sub>27</sub> H <sub>35</sub> N <sub>6</sub> O <sub>8</sub> P   | CCC(CC)COC(=O)C(C)NP(=O)(OCC1C(C(C(O1)(C#N)C2=CC=C3N2N=CN=C3N)O)OC4=CC=CC=C4 | 602.6  | 2.20/-3.25 | <i>MeSH</i> : Antiviral<br><i>TBC</i> : Adenine nucleotide analogue<br><i>Chem</i> : Aromatic amine                                                 | <b>Clinical Trials:</b> 48<br><b>NCTs:</b> NCT04365725, NCT04431453, NCT04410354, NCT04252664, NCT04292899, NCT04292730, NCT04409262, NCT04501952, NCT04257656, NCT04345419, NCT04323761, NCT04401579, NCT04492475, NCT04280705, NCT04330690, NCT04321616, NCT04488081, NCT04492501, NCT04302766, NCT04315948, NCT04501978, NCT04519424, NCT04405310, NCT04370262, NCT04523831, NCT04359095, NCT04373044, NCT04482699, NCT04365764, NCT04356417, NCT04401475, NCT04386447, NCT04359901, NCT04403477, NCT04359667, NCT04395170, NCT04429529, NCT04361461, NCT04480333, NCT04345614, NCT04349410, NCT04374071, NCT04335123, NCT04404608, NCT04351503, NCT04514627, NCT04334460, NCT04278404 |
| 12 | Dasatinib                      | 0.95 | Tr1 - Series 1-7, Tr3 - BALF |  | C <sub>22</sub> H <sub>26</sub> ClN <sub>7</sub> O <sub>2</sub> S | CC1=C(C(=CC=C1)Cl)NC(=O)C2=CN=C(S2)NC3=CC(=NC(=N3)C)N4CCN(CC4)CCO            | 488    | 2.77/-4.58 | <i>MeSH</i> : Antineoplastic<br><i>TBC</i> : Src Tyrosine kinase inhibitor<br><i>Chem</i> : Aromatic amine; Thiazoles, aminopyrimidine              |                                                                                                                                                                                                                                                                                                                                                                                                                                                                                                                                                                                                                                                                                           |

|    |                |      |                   |                                                                                    |                                                                                               |                                                                              |        |             |                                                                                                                                                                                                                                      |                                                                                                           |
|----|----------------|------|-------------------|------------------------------------------------------------------------------------|-----------------------------------------------------------------------------------------------|------------------------------------------------------------------------------|--------|-------------|--------------------------------------------------------------------------------------------------------------------------------------------------------------------------------------------------------------------------------------|-----------------------------------------------------------------------------------------------------------|
| 13 | Mercaptopurine | 0.95 | Tr4 - PBMC, GW    | 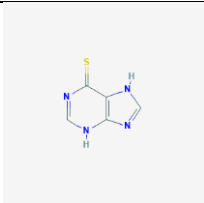   | C <sub>5</sub> H <sub>4</sub> N <sub>4</sub> S                                                | C1=NC2=C(N1)C(=S)N=CN2                                                       | 152.18 | -0.13/-2.32 | <i>MeSH</i> :Antineoplastic;Immunomodulatory agent;Antimetabolite<br><i>TBC</i> :Purine analogue;Enzyme inhibitor<br><i>Chem</i> :Sulfhydryl compound;Aryl thiol;Purine analogue                                                     |                                                                                                           |
| 14 | D3F            | 0.95 | HPAV, TaxAV       |   | C <sub>14</sub> H <sub>7</sub> Cl <sub>2</sub> F <sub>3</sub> N <sub>2</sub> O <sub>6</sub> S | CC1=CC(=C(C=C1C)Cl)S(=O)(=O)C2=C(C=C(C=C2[N+](=O)[O-]))C(F)(F)F)[N+](=O)[O-] | 459.2  | 3.43/-6.24  | <i>MeSH</i> :Enzyme inhibitor<br><i>TBC</i> : SARS replicase polyprotein 1a inhibitor<br><i>Chem</i> :Nitrobenzene; Toluene;Trifluoromethylbenzene;                                                                                  |                                                                                                           |
| 15 | Raloxifene     | 0.95 | TrC1 - Series 1-7 |   | C <sub>28</sub> H <sub>27</sub> NO <sub>4</sub> S                                             | C1CCN(CC1)CCOC2=CC=C(C=C2)C(=O)C3=C(SC4=C3C=CC(=C4)O)C5=CC=C(C=C5)O          | 473.6  | 5.45/-5.97  | <i>MeSH</i> :Antineoplastic; Bone Density Conservation agent<br><i>TBC</i> :Hormone;Selective estrogen receptor modulator; Estrogen antagonist<br><i>Chem</i> : Aromatic cyclic amino compound; Benzylidene.                         |                                                                                                           |
| 16 | Cytarabine     | 0.95 | TrC3 - BALF       |   | C <sub>9</sub> H <sub>13</sub> N <sub>3</sub> O <sub>5</sub>                                  | C1=CN(C(=O)N=C1N)C2C(C(C(O)C2)O)O                                            | 243.22 | -2.18/-0.74 | <i>MeSH</i> :Antineoplastic; Immunosuppressive; Antimetabolite; Antiviral<br><i>TBC</i> : Pyrimidine analogue; Tyrosine protein kinase Src inhibitor; protease inhibitor<br><i>Chem</i> : Heterocycle; Pyrimidine; Arabinonucleoside |                                                                                                           |
| 17 | Imatinib       | 0.95 | TrC4 - PBMC       |  | C <sub>29</sub> H <sub>31</sub> N <sub>7</sub> O                                              | CC1=C(C=C(C=C1)NC(=O)C2=CC=C(C=C2)CN3CCN(CC3)C)NC4=NC=CC(=N4)C5=CN=CC=C5     | 493.6  | 3.47/-4.53  | <i>MeSH</i> :Antineoplastic<br><i>TBC</i> :Tyrosine kinase inhibitor<br><i>Chem</i> :Benzamides; Aromatic amine                                                                                                                      | <b>Clinical Trials:</b> 5<br><b>NCTs:</b> NCT04394416, NCT04422678, NCT04346147, NCT04357613, NCT04356495 |

|    |                          |      |                  |                                                                                    |                                                                    |                                                                      |       |            |                                                                                                                                                                                                                               |                                                        |
|----|--------------------------|------|------------------|------------------------------------------------------------------------------------|--------------------------------------------------------------------|----------------------------------------------------------------------|-------|------------|-------------------------------------------------------------------------------------------------------------------------------------------------------------------------------------------------------------------------------|--------------------------------------------------------|
| 18 | Selumetinib              | 0.89 | Tr1 - Series 1-7 | 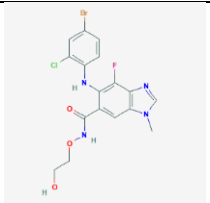   | C <sub>17</sub> H <sub>15</sub> BrClFN <sub>4</sub> O <sub>3</sub> | CN1C=NC2=C1C=C(C(=C2F)NC3=C(C=C(C=C3)Br)Cl)C(=O)NOCCO                | 457.7 | 3.24/-4.34 | <u>MeSH</u> : -Anti-neurofibromatosis type 1<br><u>TBC</u> :MAP kinase inhibitor; MEK inhibitor<br><u>Chem</u> :Secondary amino; Benzimidazole                                                                                |                                                        |
| 19 | Azd-8055                 | 0.89 | Tr2 - Series 15  |   | C <sub>25</sub> H <sub>31</sub> N <sub>5</sub> O <sub>4</sub>      | CC1COCCN1C2=N C(=NC3=C2C=CC(=N3)C4=CC(=C(C=C4)OC)CO)N5CCOC C5C       | 465.5 | 2.87/-3.29 | <u>MeSH</u> : Experimental antiproliferative<br><u>TBC</u> :Phosphatidyl inositol 3' kinase-related kinase inhibitor; Voltage-gated potassium channel ligand; Rapamycin kinase inhibitor<br><u>Chem</u> : Oxazine; Morpholine |                                                        |
| 20 | Avrainvillamide-analog-3 | 0.89 | Tr3 - BALF       |   | C <sub>22</sub> H <sub>21</sub> N <sub>3</sub> O <sub>5</sub>      | CC1(C2CC34CCCN3C(=O)C2(C=C5C1=[N+](C6=CC7=C(C=C65)OCO7)[O-]))NC4=O)C | 407.4 | 0.67/-2.79 | <u>MeSH</u> :Experimental antiproliferative<br><u>TBC</u> :Nuclear chaperone nucleophosmin ligand<br><u>Chem</u> : Alkaloid                                                                                                   |                                                        |
| 21 | Linsitinib               | 0.89 | Tr4 - PBMC       |   | C <sub>26</sub> H <sub>23</sub> N <sub>5</sub> O                   | CC1(CC(C1)C2=NC(=C3N2C=CN=C3N)C4=CC5=C(C=C4)C=CC(=N5)C6=CC=CC=C6)O   | 421.5 | 4.32/-5.19 | <u>MeSH</u> : Antineoplastic<br><u>TBC</u> : Insulin receptor inhibitor; Insulin-like growth factor-I receptor inhibitor; Type II Receptor tyrosine kinase inhibitor<br><u>Chem</u> :Pyrazines; Quinoline                     |                                                        |
| 22 | Fluocinoloneacetate      | 0.89 | TrC2 - Series 15 |  | C <sub>24</sub> H <sub>30</sub> F <sub>2</sub> O <sub>6</sub>      | CC1(OC2CC3C4CC(C5=CC(=O)C=CC5(C4(C(CC3(C2(O1)C(=O)CO)C)O)F)C)F)C     | 452.5 | 2.47/-3.92 | <u>MeSH</u> : Anti-inflammatory<br><u>TBC</u> : Steroid Hormone Receptor Agonist<br><u>Chem</u> :Steroid; Alcohol; Ketone                                                                                                     | Structurally similar in clinical trials:<br>Budesonide |

|    |                    |      |             |                                                                                   |                                                    |                                              |        |            |                                                                                                                                                                                                                                      |                                                                                                                                                                                                                                                                                                                                                                                                                                                                                                                                                                                                                                                                                                                                                                           |
|----|--------------------|------|-------------|-----------------------------------------------------------------------------------|----------------------------------------------------|----------------------------------------------|--------|------------|--------------------------------------------------------------------------------------------------------------------------------------------------------------------------------------------------------------------------------------|---------------------------------------------------------------------------------------------------------------------------------------------------------------------------------------------------------------------------------------------------------------------------------------------------------------------------------------------------------------------------------------------------------------------------------------------------------------------------------------------------------------------------------------------------------------------------------------------------------------------------------------------------------------------------------------------------------------------------------------------------------------------------|
| 23 | Dobutamine         | 0.89 | TrC3 - BALF | 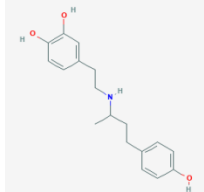  | C <sub>18</sub> H <sub>23</sub> NO <sub>3</sub>    | CC(CCC1=CC=C(C=C1)O)NCCC2=CC(=C(C=C2)O)O     | 301.4  | 2.97/-4.34 | <i>MeSH</i> : Sympathomimetic; Cardiac stimulant<br><i>TBC</i> : Adrenergic beta-1 Receptor Agonist<br><i>Chem</i> : Catecholamine; secondary amine                                                                                  |                                                                                                                                                                                                                                                                                                                                                                                                                                                                                                                                                                                                                                                                                                                                                                           |
| 24 | Bromfenac          | 0.89 | TrC4 - PBMC |  | C <sub>15</sub> H <sub>12</sub> BrNO <sub>3</sub>  | C1=CC(=C(C=C1)C(=O)C2=CC=C(C=C2)Br)N)CC(=O)O | 334.16 | 3.00/-4.42 | <i>MeSH</i> : NSAID<br><i>TBC</i> : COX inhibitor<br><i>Chem</i> : Ketone; Benzophenones; Aromatic amine; Anilines;                                                                                                                  |                                                                                                                                                                                                                                                                                                                                                                                                                                                                                                                                                                                                                                                                                                                                                                           |
| 25 | Testosterone       | 0.89 | GW          |  | C <sub>19</sub> H <sub>28</sub> O <sub>2</sub>     | CC12CCC3C(C1CC2O)CCC4=CC(=O)CCC34C           | 288.4  | 2.99/-3.94 | <i>MeSH</i> : Hormone, Androgen, Anabolic<br><i>TBC</i> : Sex hormone receptor agonist<br><i>Chem</i> : Steroid; Androgen                                                                                                            | <b>Structurally similar in clinical trials:</b><br>Hydrocortisone                                                                                                                                                                                                                                                                                                                                                                                                                                                                                                                                                                                                                                                                                                         |
| 26 | Hydroxychloroquine | 0.89 | HPH         |  | C <sub>18</sub> H <sub>26</sub> ClN <sub>3</sub> O | CCN(CCCC(C)NC1=C2C=CC(=CC2=N1)C)CCO          | 335.9  | 3.87/-4.11 | <i>MeSH</i> : Antiparasitic agent, Antimalarial, Antirheumatic agent<br><i>TBC</i> : Enzyme inhibitor, heme polymerase inhibitor, endosomes modulator, toll-like receptors inhibitor<br><i>Chem</i> : Aromatic amine; Aminoquinoline | <b>Clinical Trials:</b> 250<br><b>NCTs:</b> NCT04328272, NCT04382625, NCT04364815, NCT04358081, NCT04355026, NCT04340544, NCT04365231, NCT04329832, NCT04363866, NCT04361318, NCT04351620, NCT04429867, NCT04329611, NCT04345692, NCT04466540, NCT04385264, NCT04371406, NCT04307693, NCT04333225, NCT04334382, NCT04477083, NCT04349592, NCT04387760, NCT04342221, NCT04331834, NCT04353271, NCT04336332, NCT04374903, NCT04372017, NCT04348474, NCT04394442, NCT04359537, NCT04405921, NCT04315896, NCT04359953, NCT04362332, NCT04347889, NCT04435808, NCT04369742, NCT04323631, NCT04391127, NCT04370782, NCT04522466, NCT04397328, NCT04330586, NCT04329572, NCT04371926, NCT04329923, NCT04392128, NCT04377646, NCT04389359, NCT04341870, NCT04466280, NCT04358068, |

|  |  |  |  |  |  |  |  |  |  |                                                                                                                                                                                                                                                                                                                                                                                                                                                                                                                                                                                                                                                                                                                                                                                                                                                                                                                                                                                                                                                                                                                                                                                                                                                                                                                                                                                                                                                                                                                                                                                                                                                         |
|--|--|--|--|--|--|--|--|--|--|---------------------------------------------------------------------------------------------------------------------------------------------------------------------------------------------------------------------------------------------------------------------------------------------------------------------------------------------------------------------------------------------------------------------------------------------------------------------------------------------------------------------------------------------------------------------------------------------------------------------------------------------------------------------------------------------------------------------------------------------------------------------------------------------------------------------------------------------------------------------------------------------------------------------------------------------------------------------------------------------------------------------------------------------------------------------------------------------------------------------------------------------------------------------------------------------------------------------------------------------------------------------------------------------------------------------------------------------------------------------------------------------------------------------------------------------------------------------------------------------------------------------------------------------------------------------------------------------------------------------------------------------------------|
|  |  |  |  |  |  |  |  |  |  | NCT04438837, NCT04332094,<br>NCT04338906, NCT04353336,<br>NCT04318444, NCT04347512,<br>NCT04392973, NCT04408456,<br>NCT04261517, NCT04410562,<br>NCT04330144, NCT04381988,<br>NCT04318015, NCT04414241,<br>NCT04347980, NCT04437693,<br>NCT04341207, NCT04501965,<br>NCT04411433, NCT04354597,<br>NCT04345653, NCT04335552,<br>NCT04434144, NCT04360759,<br>NCT04435587, NCT04346329,<br>NCT04359316, NCT04372082,<br>NCT04374552, NCT04458948,<br>NCT04350450, NCT04443725,<br>NCT04303507, NCT04351516,<br>NCT04328285, NCT04354441,<br>NCT04352933, NCT04370015,<br>NCT04355052, NCT04341441,<br>NCT04344457, NCT04330690,<br>NCT04344379, NCT04330495,<br>NCT04350281, NCT04303299,<br>NCT04346147, NCT04363827,<br>NCT04328961, NCT04420247,<br>NCT04363450, NCT04349228,<br>NCT04363203, NCT04355702,<br>NCT04338698, NCT04351191,<br>NCT04502342, NCT04359095,<br>NCT04334967, NCT04423991,<br>NCT04395768, NCT04384380,<br>NCT04334148, NCT04344444,<br>NCT04361461, NCT04332991,<br>NCT04400019, NCT04352946,<br>NCT04345419, NCT04379492,<br>NCT04350684, NCT04376814,<br>NCT04403100, NCT04497519,<br>NCT04340349, NCT04453501,<br>NCT04390061, NCT04471649,<br>NCT04447534, NCT04335084,<br>NCT04342156, NCT04373044,<br>NCT04345159, NCT04345861,<br>NCT04321278, NCT04336748,<br>NCT04351919, NCT04452617,<br>NCT04491994, NCT04354870,<br>NCT04347798, NCT04334928,<br>NCT04384458, NCT04346667,<br>NCT04341493, NCT04333654,<br>NCT04371523, NCT04321616,<br>NCT04322123, NCT04386070,<br>NCT04359615, NCT04304053,<br>NCT04374019, NCT04374942,<br>NCT04425707, NCT04326725,<br>NCT04325893, NCT04364022,<br>NCT04342169, NCT04461353, |
|--|--|--|--|--|--|--|--|--|--|---------------------------------------------------------------------------------------------------------------------------------------------------------------------------------------------------------------------------------------------------------------------------------------------------------------------------------------------------------------------------------------------------------------------------------------------------------------------------------------------------------------------------------------------------------------------------------------------------------------------------------------------------------------------------------------------------------------------------------------------------------------------------------------------------------------------------------------------------------------------------------------------------------------------------------------------------------------------------------------------------------------------------------------------------------------------------------------------------------------------------------------------------------------------------------------------------------------------------------------------------------------------------------------------------------------------------------------------------------------------------------------------------------------------------------------------------------------------------------------------------------------------------------------------------------------------------------------------------------------------------------------------------------|

|    |             |      |                                |                                                                                     |                                               |            |       |            |                                                                                                                                                                                                                                                                                                                                                                                                                                                                                                                                                                                                                                                                                                                                                                                                                                                                                                                                                                                                                                                                                                                                                                     |
|----|-------------|------|--------------------------------|-------------------------------------------------------------------------------------|-----------------------------------------------|------------|-------|------------|---------------------------------------------------------------------------------------------------------------------------------------------------------------------------------------------------------------------------------------------------------------------------------------------------------------------------------------------------------------------------------------------------------------------------------------------------------------------------------------------------------------------------------------------------------------------------------------------------------------------------------------------------------------------------------------------------------------------------------------------------------------------------------------------------------------------------------------------------------------------------------------------------------------------------------------------------------------------------------------------------------------------------------------------------------------------------------------------------------------------------------------------------------------------|
|    |             |      |                                |                                                                                     |                                               |            |       |            | <p>NCT04483960, NCT04322396, NCT04334512, NCT04389320, NCT04350671, NCT04421664, NCT04434248, NCT04398004, NCT04368351, NCT04353037, NCT04339816, NCT04459702, NCT04343768, NCT04371744, NCT04383717, NCT04341727, NCT04354428, NCT04343092, NCT04446104, NCT04347031, NCT04361422, NCT04315948, NCT04434118, NCT04390152, NCT04366089, NCT04441424, NCT04418193, NCT04475588, NCT04365582, NCT04463420, NCT04381936, NCT04349241, NCT04523831, NCT04501783, NCT04460547, NCT04331470, NCT04323345, NCT04386447, NCT04328467, NCT04370262, NCT04333355, NCT04366206, NCT04363060, NCT04353245, NCT04349410, NCT04365764, NCT04386239, NCT04373824, NCT04369989, NCT04401475, NCT04359901, NCT04380818, NCT04359667, NCT04390594, NCT04445441, NCT04394182, NCT04351724, NCT04395170, NCT04454372, NCT02735707, NCT04316377, NCT04410510, NCT04432350, NCT04344951, NCT04335201, NCT04403646, NCT04374071, NCT04353180, NCT04364698, NCT04335305, NCT04405310, NCT04328012, NCT04333589, NCT04466462, NCT04528927, NCT04374539, NCT04320277, NCT04308668, NCT04412746, NCT04346693, NCT04335123, NCT04351503, NCT04462367, NCT04347850, NCT04499300, NCT04338932</p> |
| 27 | Hydroxyurea | 0.89 | TrC1 - Series 1-7, TrC3 - BALF | 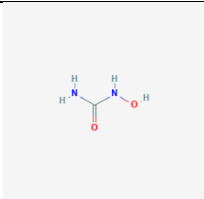 | CH <sub>4</sub> N <sub>2</sub> O <sub>2</sub> | C(=O)(N)NO | 76.05 | -1.83/0.55 | <p><u>MeSH</u>: Antineoplastic agent, Antimetabolite, Antisickling agent<br/> <u>TBC</u>: Nucleic acid synthesis inhibitor; Ribonucleoside-diphosphate reductase inhibitor<br/> <u>Chem</u>: Urea</p>                                                                                                                                                                                                                                                                                                                                                                                                                                                                                                                                                                                                                                                                                                                                                                                                                                                                                                                                                               |



|    |              |      |                                           |                                                                                    |                                                                                  |                                                                                                     |        |             |                                                                                                                                                                                                   |  |
|----|--------------|------|-------------------------------------------|------------------------------------------------------------------------------------|----------------------------------------------------------------------------------|-----------------------------------------------------------------------------------------------------|--------|-------------|---------------------------------------------------------------------------------------------------------------------------------------------------------------------------------------------------|--|
| 28 | F3F          | 0.89 | HPAV,<br>TaxAV                            | 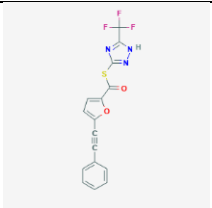   | C <sub>16</sub> H <sub>8</sub> F <sub>3</sub> N <sub>3</sub> O <sub>2</sub><br>S | C1=CC=C(C=C1)C#<br>CC2=CC=C(O2)C(=O)<br>SC3=NNC(=N3)<br>C(F)(F)F                                    | 363.3  | 3.93/-4.16  | <u>MeSH</u> :-<br><u>TBC</u> : SARS-CoV replicase<br>polyprotein 1ab inhibitor<br><u>Chem</u> : Furan; Triazole                                                                                   |  |
| 29 | Daunorubicin | 0.84 | Tr1 - Series<br>1-7, TrC1 -<br>Series 1-7 |   | C <sub>27</sub> H <sub>29</sub> NO <sub>10</sub>                                 | CC1C(C(CC(O1)OC<br>2CC(CC3=C2C(=C4<br>C(=C3O)C(=O)C5=<br>C(C4=O)C(=CC=C5<br>)OC)O)(C(=O)C)O)<br>N)O | 527.5  | 1.68/-2.93  | <u>MeSH</u> : Antineoplastic;<br>Antibiotic<br><u>TBC</u> : Topoisomerase II<br>Inhibitor<br><u>Chem</u> : Aminoglycosides;<br>Anthracyclines; Cyclic<br>ketone, Acenoquinone                     |  |
| 30 | PD-0325901   | 0.84 | Tr2 - Series<br>15, Tr1 -<br>Series 1-7   |   | C <sub>16</sub> H <sub>14</sub> F <sub>3</sub> I N <sub>2</sub> O <sub>4</sub>   | C1=CC(=C(C=C1)F<br>)NC2=C(C(=CC(=C2<br>F)F)C(=O)NOCC(C<br>O)O                                       | 482.19 | 2.64/-4.19  | <u>MeSH</u> : Experimental<br>antineoplastic<br><u>TBC</u> : MAPK inhibitor<br><u>Chem</u> : Benzamide                                                                                            |  |
| 31 | Zidovudine   | 0.84 | TrC2 - Series<br>15, HPAV                 |   | C <sub>10</sub> H <sub>13</sub> N <sub>5</sub> O <sub>4</sub>                    | CC1=CN(C(=O)NC<br>1=O)C2CC(C(O2)C<br>O)N=[N+]=[N-]                                                  | 267.24 | -0.10/-1.21 | <u>MeSH</u> : Antiviral agent,<br>Antimetabolite<br><u>TBC</u> : Nucleoside and<br>Nucleotide Reverse<br>Transcriptase Inhibitor<br><u>Chem</u> : Glycoside;<br>Pyrimidine;<br>Dideoxynucleosides |  |
| 32 | GRL0617      | 0.84 | HPAV,<br>TaxAV                            |  | C <sub>20</sub> H <sub>20</sub> N <sub>2</sub> O                                 | CC1=C(C=C(C=C1)<br>N)C(=O)NC(C)C2=<br>CC=CC3=CC=CC=C<br>32                                          | 304.4  | 3.79/-5.73  | <u>MeSH</u> :-<br><u>TBC</u> : SARS-CoV replicase<br>polyprotein 1ab inhibitor<br><u>Chem</u> : Carboxylic acid<br>nitrile; cyano compound;<br>peptide                                            |  |

|    |               |      |             |                                                                                    |                                                                 |                                                                           |        |            |                                                                                                                                                                                                                                                                                                               |                                        |
|----|---------------|------|-------------|------------------------------------------------------------------------------------|-----------------------------------------------------------------|---------------------------------------------------------------------------|--------|------------|---------------------------------------------------------------------------------------------------------------------------------------------------------------------------------------------------------------------------------------------------------------------------------------------------------------|----------------------------------------|
| 33 | AG-14361      | 0.84 | Tr3 - BALF  | 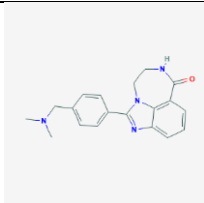   | C <sub>19</sub> H <sub>20</sub> N <sub>4</sub> O                | CN(C)CC1=CC=C(C=C1)C2=NC3=CC=CC4=C3N2CCNC4=O                              | 320.4  | 2.38/-3.13 | <u>MeSH</u> : -<br><u>TBC</u> : Poly ADP-ribose polymerase 1 inhibitor<br><u>Chem</u> :Benzodiazepine; Benzimidazole                                                                                                                                                                                          |                                        |
| 34 | Dactolisib    | 0.84 | Tr4 - PBMC  |   | C <sub>30</sub> H <sub>23</sub> N <sub>5</sub> O                | CC(C)(C#N)C1=CC=C(C=C1)N2C3=C4C=C(C=CC4=NC=C3N(C2=O)C)C5=CC6=CC=CC=C6N=C5 | 469.5  | 4.65/-4.92 | <u>MeSH</u> : Antineoplastic<br><u>TBC</u> : Phosphatidyl inositol 3' kinase-related kinase inhibitor; Lipid modifying kinase inhibitor<br><u>Chem</u> :Imidazole;Imidazoquinoline                                                                                                                            | Clinical Trial: 1<br>NCTs: NCT04409327 |
| 35 | Carboplatin   | 0.84 | TrC3 - BALF |   | C <sub>6</sub> H <sub>12</sub> N <sub>2</sub> O <sub>4</sub> Pt | C1CC(C1)(C(=O)O)C(=O)O.[NH2-].[NH2-].[Pt+2]                               | 371.25 | 0.04/0.14  | <u>MeSH</u> : Antineoplastic<br><u>TBC</u> :Aquation agent<br><u>Chem</u> : Coordination Complex; Platinum compound                                                                                                                                                                                           |                                        |
| 36 | Zileuton      | 0.84 | TrC4 - PBMC |   | C <sub>11</sub> H <sub>12</sub> N <sub>2</sub> O <sub>2</sub> S | CC(C1=CC2=CC=C(C=C2S1)N(C(=O)N)O                                          | 236.29 | 2.01/-3.64 | <u>MeSH</u> : NSAID<br><u>TBC</u> : Leukotriene antagonist; Lipoxygenase Inhibitor<br><u>Chem</u> :Urea; Benzothiophene                                                                                                                                                                                       |                                        |
| 37 | Staurosporine | 0.84 | GW          |  | C <sub>28</sub> H <sub>26</sub> N <sub>4</sub> O <sub>3</sub>   | CC12C(C(CC(O1)N3C4=CC=CC=C4C5=C6C(=C7C8=CC=CC=C8N2C7=C53)CNC6=O)NC)OC     | 466.5  | 3.14/-4.03 | <u>MeSH</u> : Multi-enzyme inhibitor<br><u>TBC</u> : Protein kinase C inhibitor; CAMK2 inhibitor; Death-associated kinase inhibitor; Phosphorylase kinase inhibitor; Tyrosine-(Y)-phosphorylation regulated kinase inhibitor; Acetylcholine receptor ligand<br><u>Chem</u> : Indole; indolocarbazole alkaloid |                                        |

|    |                      |      |                   |                                                                                     |                                                                              |                                                      |        |             |                                                                                                                                                                           |                                                      |
|----|----------------------|------|-------------------|-------------------------------------------------------------------------------------|------------------------------------------------------------------------------|------------------------------------------------------|--------|-------------|---------------------------------------------------------------------------------------------------------------------------------------------------------------------------|------------------------------------------------------|
| 38 | Fasudil              | 0.79 | Tr2 - Series 15   | 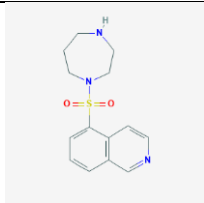    | C <sub>14</sub> H <sub>17</sub> N <sub>3</sub> O <sub>2</sub> S              | C1CNCCN(C1)S(=O)(=O)C2=CC=CC3=C2C=CN=C3              | 291.37 | 0.16/-2.74  | <u>MeSH</u> : Peripheral vasodilators<br><u>TBC</u> : ROCK inhibitor; DMPK kinase inhibitor; Calcium Channel Blocker<br><u>Chem</u> : Sulfonamides                        |                                                      |
| 39 | GSK-1059615          | 0.79 | Tr3 - BALF        |    | C <sub>18</sub> H <sub>11</sub> N <sub>3</sub> O <sub>2</sub> S              | C1=CC2=NC=CC(=C2C=C1C=C3C(=O)NC(=O)S3)C4=CC=NC=C4    | 333.4  | 2.71/-4.92  | <u>MeSH</u> :-<br><u>TBC</u> : Enzyme inhibitor, PI3K inhibitor<br><u>Chem</u> : Pyridine; quinoline; thiazolidinone                                                      |                                                      |
| 40 | Pi 103 hydrochloride | 0.79 | Tr4 - PBMC        |    | C <sub>19</sub> H <sub>17</sub> ClN <sub>4</sub> O <sub>3</sub>              | C1COCCN1C2=NC(=NC3=C2OC4=C3C=CC=N4)C5=CC(=CC=C5)O.Cl | 384.8  | 3.23/-3.10  | <u>MeSH</u> : -<br><u>TBC</u> : AGC protein kinase inhibitor; PKC inhibitor; CMGC protein kinase inhibitor; tyrosine protein kinase inhibitor<br><u>Chem</u> : Pyrimidine |                                                      |
| 41 | Hexachlorophene      | 0.79 | TrC1 - Series 1-7 |    | C <sub>13</sub> H <sub>6</sub> Cl <sub>6</sub> O <sub>2</sub>                | C1=C(C(=C(C(=C1C)Cl)Cl)CC2=C(C(=CC(=C2Cl)Cl)Cl)O)Cl  | 406.9  | 6.77/-5.97  | <u>MeSH</u> : Anti-infective agent, Antiseptic<br><u>TBC</u> : -<br><u>Chem</u> : Chlorobenzene; Chlorophenol                                                             |                                                      |
| 42 | Ofloxacin            | 0.79 | TrC2 - Series 15  |   | C <sub>18</sub> H <sub>20</sub> F <sub>3</sub> N <sub>4</sub> O <sub>4</sub> | CC1COC2=C3N1C=C(C(=O)C3=CC(=C2N4CCN(CC4)C)F)C(=O)O   | 361.4  | -0.02/-2.40 | <u>MeSH</u> : Antibacterial; Antineoplastic<br><u>TBC</u> : Topoisomerase IV inhibitor<br><u>Chem</u> : Aromatic amine; N-arylpiperazine; quinolone                       | Clinical Trial: 1<br>NCTs: NCT02735707               |
| 43 | Leflunomide          | 0.79 | TrC3 - BALF       |  | C <sub>12</sub> H <sub>9</sub> F <sub>3</sub> N <sub>2</sub> O <sub>2</sub>  | CC1=C(C(=NO1)C(=O)NC2=CC=C(C=C2)C(F)(F)F)            | 270.21 | 2.52/-3.51  | <u>MeSH</u> : Antirheumatic agent<br><u>TBC</u> : Nucleoside synthesis inhibitor; oxidoreductase inhibitor<br><u>Chem</u> : Isoxazole                                     | Clinical Trials: 2<br>NCTs: NCT04361214, NCT04434118 |

|    |                                        |      |                  |                                                                                    |                                                               |                                                        |        |            |                                                                                                                                                                                                          |
|----|----------------------------------------|------|------------------|------------------------------------------------------------------------------------|---------------------------------------------------------------|--------------------------------------------------------|--------|------------|----------------------------------------------------------------------------------------------------------------------------------------------------------------------------------------------------------|
| 44 | Prasterone                             | 0.79 | GW               | 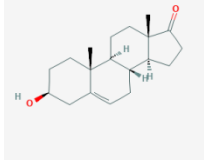  | C <sub>19</sub> H <sub>28</sub> O <sub>2</sub>                | CC12CCC3C(C1CC2=O)CC=C4C3(CC(C4)O)C                    | 288.4  | 3.53/-3.82 | <i>MeSH</i> : Anabolic steroid, hormone<br><i>TBC</i> : Estrogen receptor agonist; androgen receptor agonist; GABA <sub>A</sub> antagonist, NMDA agonist<br><i>Chem</i> : Steroid                        |
| 45 | N-(2-aminoethyl)-1-aziridineethanamine | 0.79 | HPH              |   | C <sub>6</sub> H <sub>15</sub> N <sub>3</sub>                 | C1CN1CCNCCN                                            | 129.2  | -1.36/0.49 | <i>MeSH</i> : Experimental antiviral agent<br><i>TBC</i> : ACE2 inhibitor<br><i>Chem</i> : Aziridine                                                                                                     |
| 46 | Triptolide                             | 0.79 | Tr1 - Series 1-7 |   | C <sub>20</sub> H <sub>24</sub> O <sub>6</sub>                | CC(C)C12C(O1)C3C4(O3)C5(CCC6=C(C5CC7C4(C2O)O7)COC6=O)C | 360.4  | 1.22/-2.61 | <i>MeSH</i> : Antineoplastic alkylating agent; antispermatogenic agent; immunosuppressive agent,<br><i>TBC</i> : Multiprotein inhibitor<br><i>Chem</i> : Terpene; phenanthrenes; diterpenes; diterpenoid |
| 47 | WR1                                    | 0.79 | HPAV, TaxAV      |   | C <sub>22</sub> H <sub>26</sub> N <sub>2</sub> O <sub>5</sub> | CC(C(=O)CCO)NC(=O)C(CC1=CC=CC=C1)NC(=O)OCC2=CC=CC=C2   | 398.5  | 1.55/-4.44 | <i>MeSH</i> : -<br><i>TBC</i> : Inhibitor for the Major Protease of the SARS Coronavirus<br><i>Chem</i> : Benzyloxycarbonyl; benzyloxycarbonyl                                                           |
| 48 | Y-27632                                | 0.74 | Tr1 - Series 1-7 |  | C <sub>14</sub> H <sub>21</sub> N <sub>3</sub> O              | CC(C1CCC(CC1)C(=O)NC2=CC=NC=C2)N                       | 247.34 | 1.00/-2.65 | <i>MeSH</i> : Neuromuscular; muscle relaxant; antihypertensive agent; Enzyme inhibitor<br><i>TBC</i> : Rho kinase inhibitor, protein kinase N inhibitor.<br><i>Chem</i> : Pyridine; aromatic amide       |

|    |             |      |                   |                                                                                    |                                                                 |                                                                                   |        |            |                                                                                                                                                                                               |                                                                                              |
|----|-------------|------|-------------------|------------------------------------------------------------------------------------|-----------------------------------------------------------------|-----------------------------------------------------------------------------------|--------|------------|-----------------------------------------------------------------------------------------------------------------------------------------------------------------------------------------------|----------------------------------------------------------------------------------------------|
| 49 | DG8735000   | 0.74 | HPAV,<br>TaxAV    | 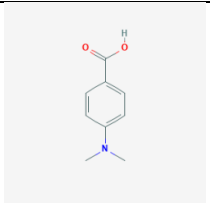   | C <sub>9</sub> H <sub>11</sub> NO <sub>2</sub>                  | CN(C)C1=CC=C(C=C1)C(=O)O                                                          | 165.19 | 1.51/-1.29 | <i>MeSH:</i> -<br><i>TBC:</i> Inhibitor of ultraviolet mediated damage<br><i>Chem:</i> Aminobenzoate                                                                                          |                                                                                              |
| 50 | Saracatinib | 0.74 | Tr3 - BALF        |   | C <sub>27</sub> H <sub>32</sub> ClN <sub>5</sub> O <sub>5</sub> | CN1CCN(CC1)CCO<br>C2=CC3=C(C(=C2)OC4CCOCC4)C(=N<br>C=N3)NC5=C(C=C<br>C6=C5OCO6)Cl | 542    | 3.53/-3.76 | <i>MeSH:</i> Antineoplastic agent; enzyme inhibitor<br><i>TBC:</i> Src inhibitor; tyrosine kinase inhibitor<br><i>Chem:</i> Benzodioxoles; quinazoline                                        |                                                                                              |
| 51 | LY-255283   | 0.74 | Tr4 - PBMC        |   | C <sub>19</sub> H <sub>28</sub> N <sub>4</sub> O <sub>3</sub>   | CCC1=CC(=C(C=C1)OCCCCC(C)(C)C2=NNN=N2)O)C(=O)C                                    | 360.5  | 4.55/-3.95 | <i>MeSH:</i> Antiasthmatic agent<br><i>TBC:</i> Leukotriene Antagonists<br><i>Chem:</i> Tetrazoles; aromatic ketone                                                                           |                                                                                              |
| 52 | Rofecoxib   | 0.74 | TrC1 - Series 1-7 |   | C <sub>17</sub> H <sub>14</sub> O <sub>4</sub> S                | CS(=O)(=O)C1=CC=C(C=C1)C2=C(C(=O)OC2)C3=CC=CC=C3                                  | 314.4  | 2.32/-4.47 | <i>MeSH:</i> NSAID; Analgesic non-narcotic agent<br><i>TBC:</i> COX2 inhibitor<br><i>Chem:</i> Lactone; furan; butanolide                                                                     |                                                                                              |
| 53 | Simvastatin | 0.74 | GW                |  | C <sub>25</sub> H <sub>38</sub> O <sub>5</sub>                  | CCC(C)(C)C(=O)OC1CC(C=C2C1C(C(C=C2)C)CCC3CC(C(=O)O3)O)C                           | 418.6  | 4.51/-4.53 | <i>MeSH:</i> Antimetabolite; anticholesteremic; hypolipidemic<br><i>TBC:</i> Hydroxymethylglutaryl-CoA Reductase Inhibitor<br><i>Chem:</i> Polycyclic aromatic; naphthalene; fatty acid ester | <b>Clinical Trials:</b> 4<br><b>NCTs:</b> NCT04343001, NCT04348695, NCT04407273, NCT02735707 |

|    |                |      |                  |                                                                                    |                                                                 |                                                                                                  |        |            |                                                                                                                                                     |
|----|----------------|------|------------------|------------------------------------------------------------------------------------|-----------------------------------------------------------------|--------------------------------------------------------------------------------------------------|--------|------------|-----------------------------------------------------------------------------------------------------------------------------------------------------|
| 54 | ebastine       | 0.74 | TrC2 - Series 15 | 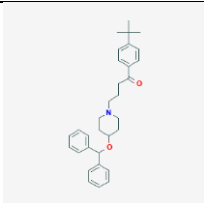   | C <sub>32</sub> H <sub>39</sub> NO <sub>2</sub>                 | CC(C)(C)C1=CC=C(C=C1)C(=O)CCCN2CCC(CC2)OC(C3=CC=CC=C3)C4=CC=CC=C4                                | 469.7  | 6.89/-6.86 | <i>MeSH:</i> Antihistamine<br><i>TBC:</i> H1 antagonist<br><i>Chem:</i> Piperidine; ketone, butyrophenone                                           |
| 55 | Cisplatin      | 0.74 | TrC3 - BALF      |   | H <sub>4</sub> Cl <sub>2</sub> N <sub>2</sub> Pt                | [NH <sub>2</sub> ].[NH <sub>2</sub> ].Cl[Pt+2]Cl                                                 | 298    | 0.33/-0.77 | <i>MeSH:</i> Antineoplastic; radiation-sensitizing agent<br><i>TBC:</i> DNA replication inhibition<br><i>Chem:</i> Platinum compound                |
| 56 | Hydroquinone   | 0.74 | TrC4 - PBMC      |   | C <sub>6</sub> H <sub>6</sub> O <sub>2</sub>                    | C1=CC(=CC=C1O)O                                                                                  | 110.11 | 0.71/-0.06 | <i>MeSH:</i> Antioxidant; radiation-protective agent<br><i>TBC:</i> Melanin Synthesis Inhibitor; HDAC inhibitor<br><i>Chem:</i> Phenol; benzenediol |
| 57 | Calciumcitrate | 0.74 | HPH              |   | C <sub>12</sub> H <sub>10</sub> Ca <sub>3</sub> O <sub>14</sub> | C(C(=O)[O-])C(CC(=O)[O-])(C(=O)[O-])O.C(C(=O)[O-])C(CC(=O)[O-])(C(=O)[O-])O.[Ca+2].[Ca+2].[Ca+2] | 498.4  | 0.13/-2.08 | <i>MeSH:</i> Anticoagulant<br><i>TBC:</i> Calcium chelating agent<br><i>Chem:</i> Tricarboxylic acid derivative                                     |
| 58 | JAK3-IN-1      | 0.68 | Tr1 - Series 1-7 |  | C <sub>26</sub> H <sub>30</sub> ClN <sub>7</sub> O <sub>2</sub> | CN1CCN(CC1)C2=CC(=C(C=C2)NC3=NC=C(C(=N3)NCC4=CC(=CC=C4)NC(=O)C=C)Cl)OC                           | 508    | 4.54/-4.53 | <i>MeSH:</i> -<br><i>TBC:</i> AGC protein kinase inhibitor; tyrosine kinase inhibitor<br><i>Chem:</i> Heterocyclic compound                         |

|    |                   |      |                                |                                                                                     |                                                                 |                                                                      |        |             |                                                                                                                                                                                 |                                                                   |
|----|-------------------|------|--------------------------------|-------------------------------------------------------------------------------------|-----------------------------------------------------------------|----------------------------------------------------------------------|--------|-------------|---------------------------------------------------------------------------------------------------------------------------------------------------------------------------------|-------------------------------------------------------------------|
| 59 | Pracinostat       | 0.68 | Tr3 - BALF                     | 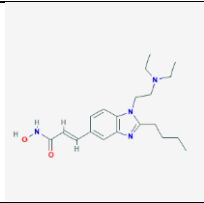    | C <sub>20</sub> H <sub>30</sub> N <sub>4</sub> O <sub>2</sub>   | CCCCC1=NC2=C(N1CCN(CC)CC)C=CC(=C2)C=CC(=O)NO                         | 358.5  | 3.98/-4.07  | <i>MeSH</i> : Experimental antineoplastic<br><i>TBC</i> : Histone deacetylase inhibitor<br><i>Chem</i> : Benzimidazole                                                          |                                                                   |
| 60 | Blebbistatin      | 0.68 | Tr4 - PBMC                     |    | C <sub>18</sub> H <sub>16</sub> N <sub>2</sub> O <sub>2</sub>   | CC1=CC2=C(C=C1)N=C3C(C2=O)(CCN3C4=CC=CC=C4)O                         | 292.3  | 2.00/-3.17  | <i>MeSH</i> :-<br><i>TBC</i> : Myosin inhibitor<br><i>Chem</i> : Tertiary alcohol; ketone; pyrroloquinoline                                                                     |                                                                   |
| 61 | Pioglitazone      | 0.68 | TrC1 - Series 1-7              |    | C <sub>19</sub> H <sub>20</sub> N <sub>2</sub> O <sub>3</sub> S | CCC1=CN=C(C=C1)CCOC2=CC=C(C=C2)CC3C(=O)NC(=O)S3                      | 356.4  | 3.17/-4.91  | <i>MeSH</i> : Hypoglycemic agent (antidiabetic)<br><i>TBC</i> : Peroxisome proliferator-activated receptor-gamma activator<br><i>Chem</i> : Azole; thiazole; thiazolidinedione  | Clinical Trials: 2<br>NCTs: NCT04473274, NCT04500639              |
| 62 | Tegafur           | 0.68 | TrC2 - Series 15               |    | C <sub>8</sub> H <sub>9</sub> FN <sub>2</sub> O <sub>3</sub>    | C1CC(OC1)N2C=C(C(=O)NC2=O)F                                          | 200.17 | -0.09/-1.16 | <i>MeSH</i> : Antimetabolite; Antineoplastic; Immunosuppressive<br><i>TBC</i> : Thymidylate synthase inhibitor<br><i>Chem</i> : Pyrimidine; fluorouracil                        |                                                                   |
| 63 | Cholinesalicylate | 0.68 | HPH                            |   | C <sub>12</sub> H <sub>19</sub> NO <sub>4</sub>                 | C[N+](C)(C)CCO.C1=CC=C(C(=C1)C(=O)O)[O-]                             | 241.28 | -0.30/-2.80 | <i>MeSH</i> : NSAID, analgesic non-narcotic<br><i>TBC</i> : COX inhibitor<br><i>Chem</i> : Acid; benzoate; salicylate, phenol; hydroxybenzoic acid                              |                                                                   |
| 64 | Methotrexate      | 0.68 | TrC4 - PBMC, TrC1 - Series 1-7 |  | C <sub>20</sub> H <sub>22</sub> N <sub>8</sub> O <sub>5</sub>   | CN(CC1=CN=C2C(=N1)C(=NC(=N2)N)N)C3=CC=C(C=C3)C(=O)NC(CCC(=O)O)C(=O)O | 454.4  | -0.91/-3.42 | <i>MeSH</i> : Antimetabolite; antineoplastic; abortifacient; immunosuppressive; antirheumatic<br><i>TBC</i> : Folic acid metabolism inhibitor; nucleic acid synthesis inhibitor | Clinical Trials: 3<br>NCTs: NCT04352465, NCT04434118, NCT04481633 |

|    |            |      |                                     |                                                                                   |                                                  |                                         |       |            |                                                                                                                                                                               |  |
|----|------------|------|-------------------------------------|-----------------------------------------------------------------------------------|--------------------------------------------------|-----------------------------------------|-------|------------|-------------------------------------------------------------------------------------------------------------------------------------------------------------------------------|--|
|    |            |      |                                     |                                                                                   |                                                  |                                         |       |            | <i>Chem:</i> Acid; pterin;<br>aminopterin                                                                                                                                     |  |
| 65 | Clofibrate | 0.68 | TrC3 - BALF,<br>TrC2 - Series<br>15 | 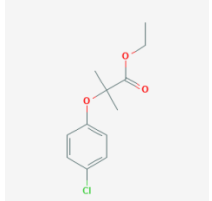 | C <sub>12</sub> H <sub>15</sub> ClO <sub>3</sub> | CCOC(=O)C(C)(C)<br>OC1=CC=C(C=C1)<br>Cl | 242.7 | 3.99/-3.92 | <i>MeSH:</i> Hypolipemic;<br>Anticholesteremic<br><i>TBC:</i> Peroxisome<br>proliferator-activated<br>receptor-gamma inhibitor<br><i>Chem:</i> Clofibric Acid; ethyl<br>ester |  |
